# Supplementary material for: Real-time regulation of catalysis by remote-controlled enzyme-conjugated gold nanorod composites for aldol reaction-based applications
Source: Royal Society of Chemistry journal article supplement (doi:10.1039/c9cy00167k), 2019-01-01
Supplement: c9cy00167k1.pdf [file c9cy00167k1.pdf]

Supplementary materials

**Real-time regulation of catalysis by remote controlled enzyme-conjugated gold nanorods composites and application in aldol reaction**

Wei Li<sup>§</sup>, Dongni Liu<sup>§</sup>, Zhengqiang Li\* and Renjun Gao\*

*Key Laboratory for Molecular Enzymology and Engineering of Ministry of Education, School of Life Science, Jilin University, Changchun, 130012, China. E-mail: lzq@jlu.edu.cn(ZL) and gaorj@jlu.edu.cn(RG)*

<sup>§</sup>These authors contributed equally to this work.

\* Correspondence author: Renjun Gao (RG) and Zhengqiang Li (ZL)

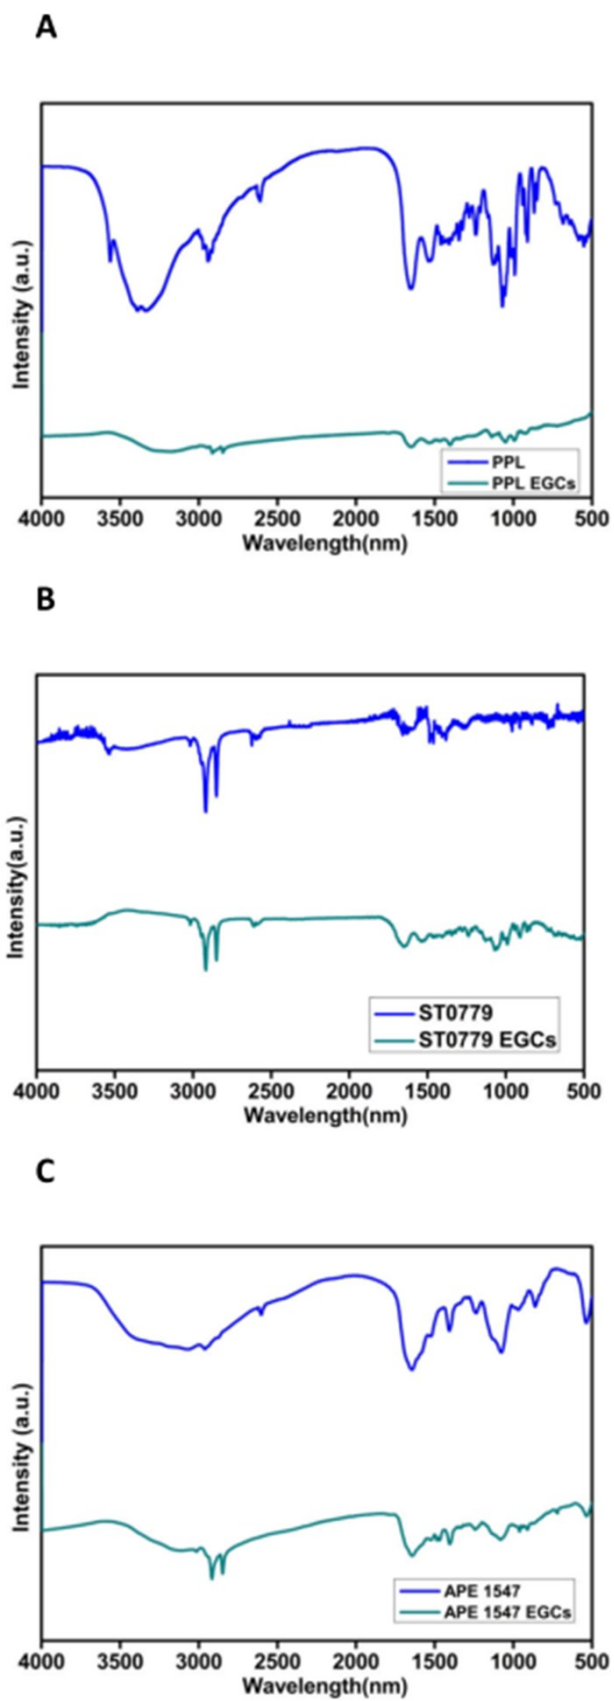

**Figure S1.** FTIR spectra of PPL (A), ST0779 (B), APE1547 (C) and respective EGCs.

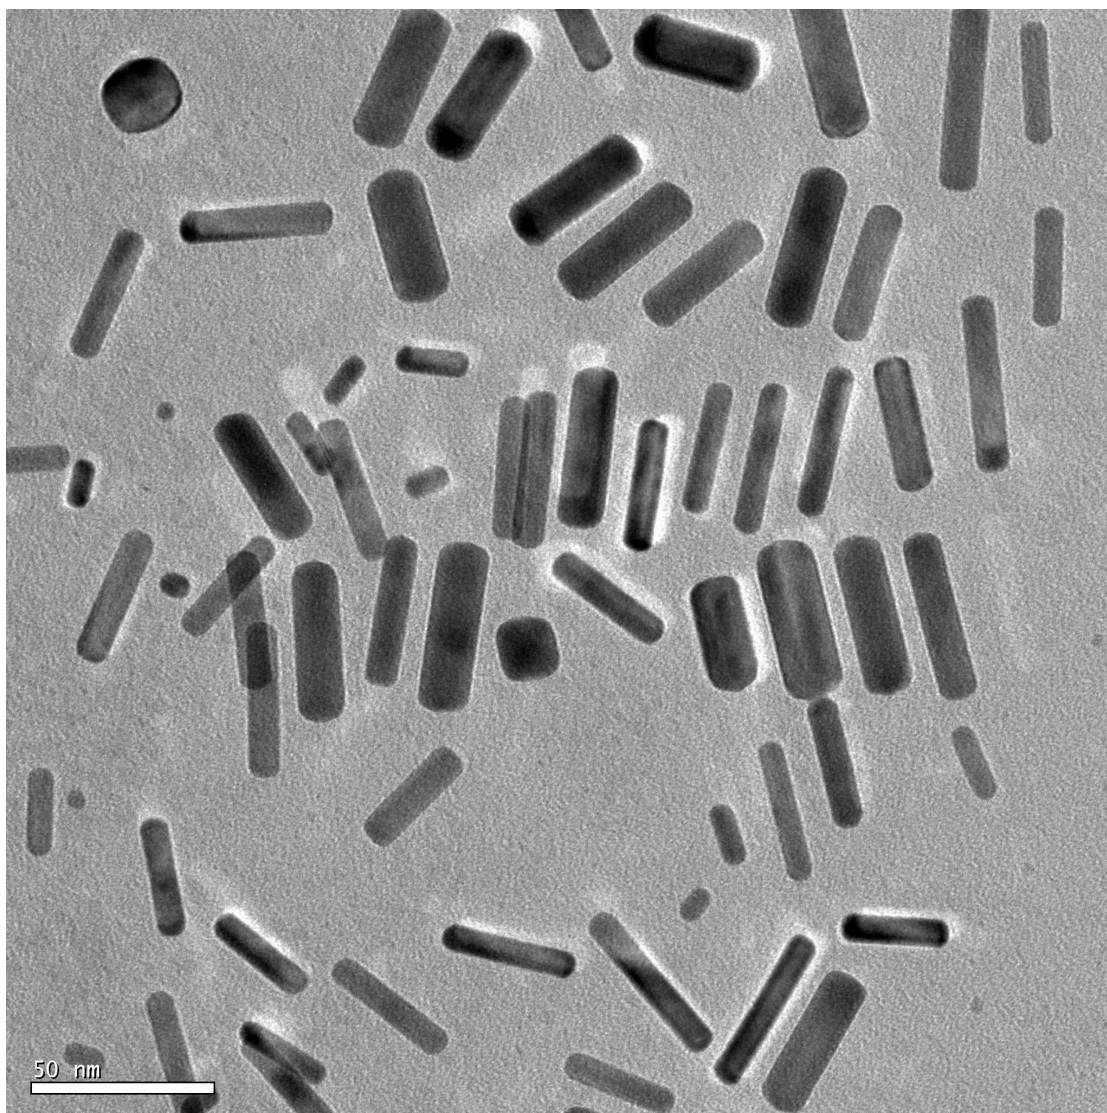

**Figure S2.** TEM image of as synthesized EGCs.

| Entry | Enzyme   | Catalytic Condition | Time(h) | Yield(%) |
|-------|----------|---------------------|---------|----------|
| 1     | PPL      | 37°C water bath     | 24      | 96.4     |
| 2     | ST0779   | 55°C water bath     | 4       | 97.5     |
| 3     | APE1547  | 55°C water bath     | 4       | 94.9     |
| 4     | PPL EGCs | NIR                 | 0.5     | 95.4     |
| 5     | ST EGCs  | NIR                 | 0.5     | 98.8     |
| 6     | APE EGCs | NIR                 | 0.5     | 99.3     |

---

|   |                   |                 |    |      |
|---|-------------------|-----------------|----|------|
| 7 | Control/No enzyme | 37°C water bath | 24 | <0.5 |
| 8 | Control/No enzyme | 55°C water bath | 4  | <0.5 |

---

**Table S1.** Comparison of wild type and its enzyme-GNRs complexes in aldol addition.
